# Supplementary material for: Simple and rapid process for single cell micro-patterning
Source: Royal Society of Chemistry journal article supplement (doi:10.1039/b821581m), 2009-01-01
Supplement: b821581m_details.pdf [file b821581m_details.pdf]

## Supplementary materials

### Movie legends :

Movie 1: RPE1 cells seeded on fibronectin micro-patterns fabricated by deep UV irradiation of a PLL-g-PEG coated glass coverslip. Phase contrast time laps movie was recorded using a Nikon inverted microscope with an environmental chamber controlling temperature and CO<sub>2</sub>, with 20X objective, during 64h

Movie 2: RPE1 cells seeded on fibronectin micro-patterns fabricated by deep UV irradiation of a polystyrene plate. Phase contrast time laps movie was recorded using a Nikon inverted microscope with an environmental chamber controlling temperature and CO<sub>2</sub>, with 20X objective, during 64h. Note that micro-patterns are visible in phase contrast.

Movie 3: Illustration for the assembly process of a 96 well plate with micro-patterns. The animation shows how the plate is assembled, then a true image of fluorescent protein patterns from one well of a 96 well plate is shown with a progressive zoom on the patterns, increasing the magnification used.
